# Supplementary material for: Cellular Reprogramming Allows Generation of Autologous Hematopoietic Progenitors From AML Patients That Are Devoid of Patient-Specific Genomic Aberrations
Source: PubMed Central journal article supplement — Stem Cells. 2015 May 21;33(6):1839–49. doi: 10.1002/stem.1994 (PMC4691325; doi:10.1002/stem.1994), 2015-05-21

**A** Bone Marrow Aspirate Smear

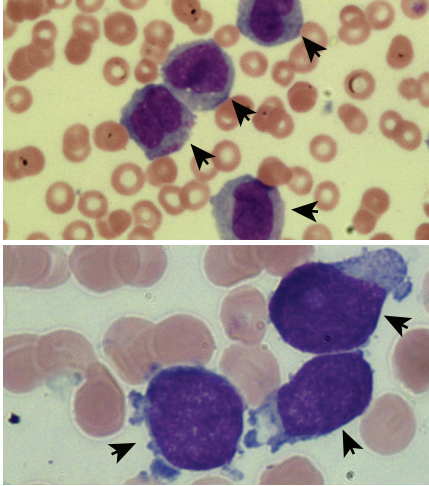

**B** Bone Marrow Biopsy

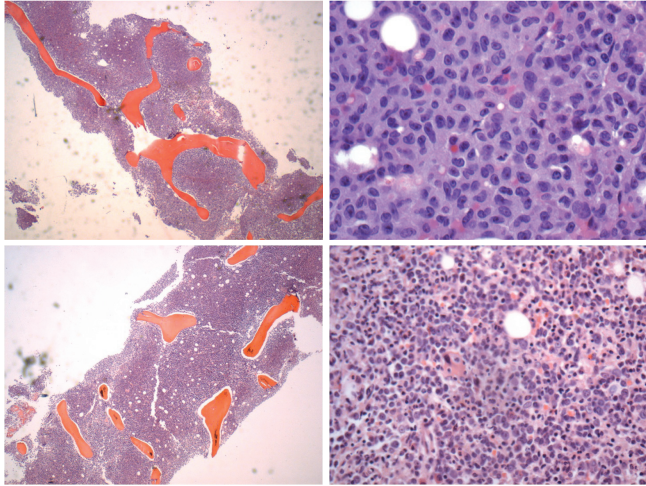

**C**

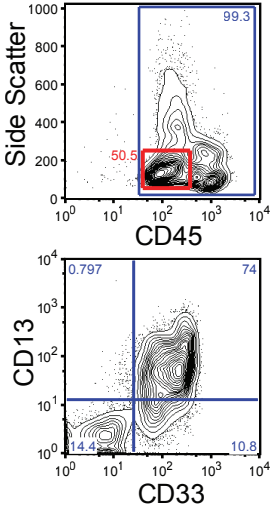

Primary Fibroblast cultures

Primary BM monoclear cell cultures

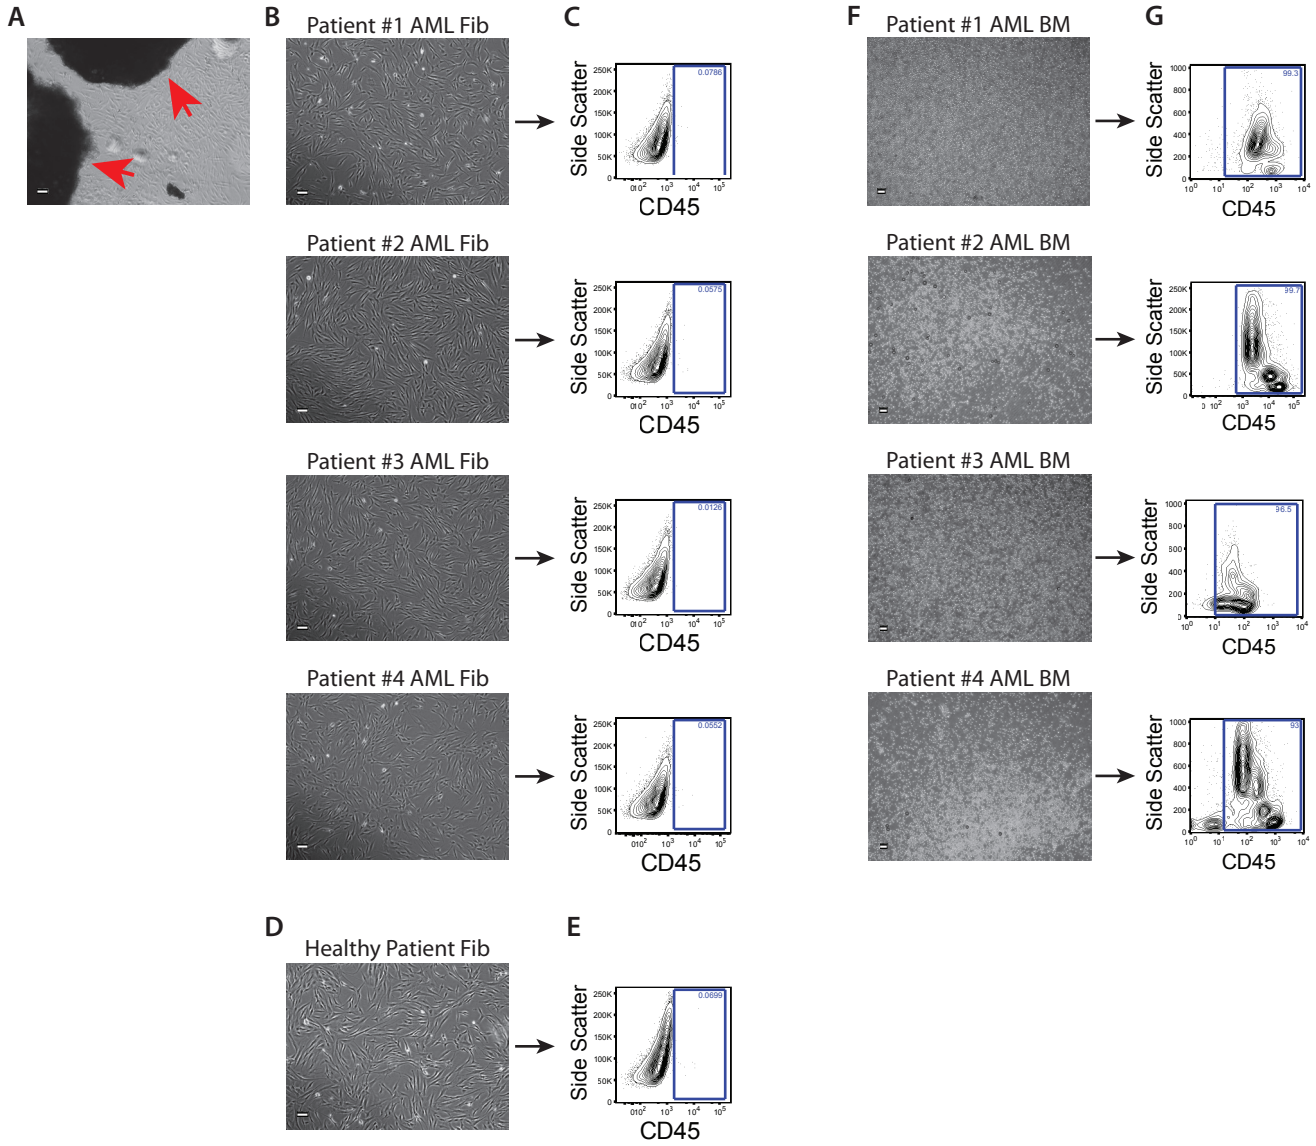

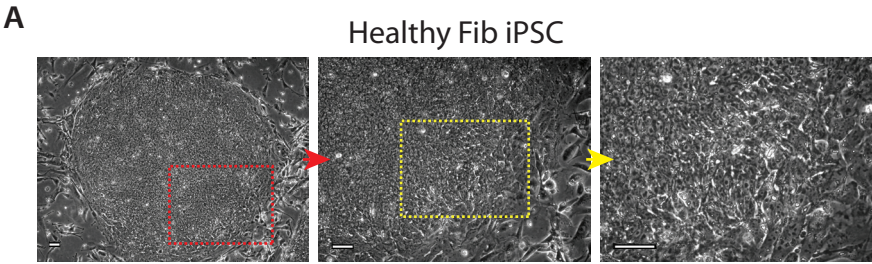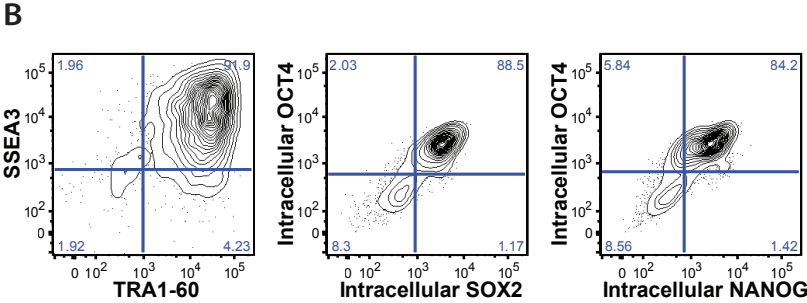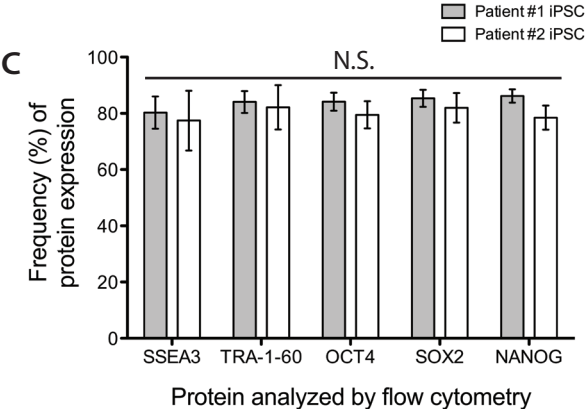

Patient #4

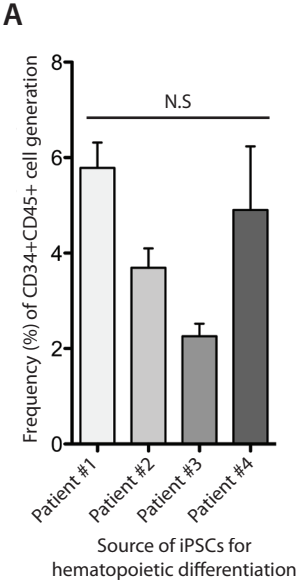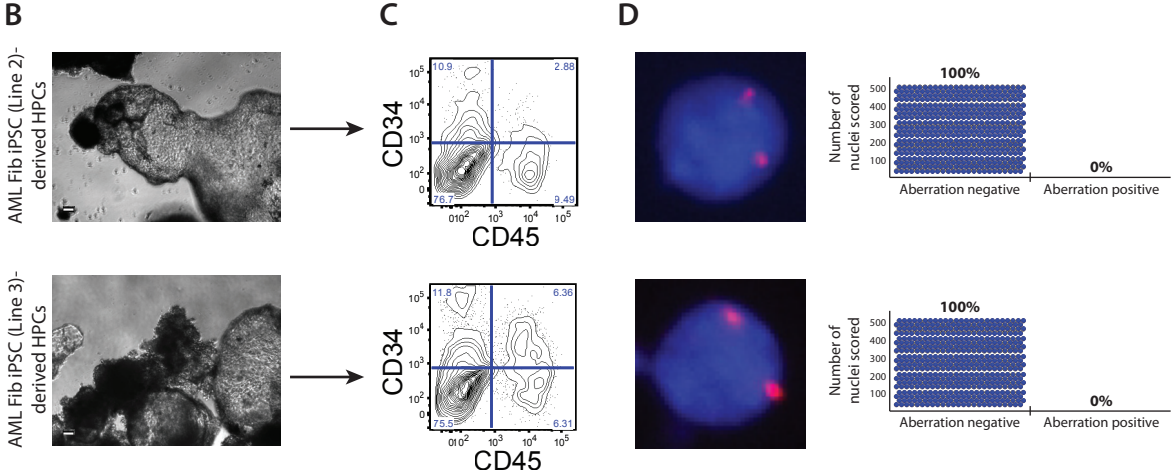

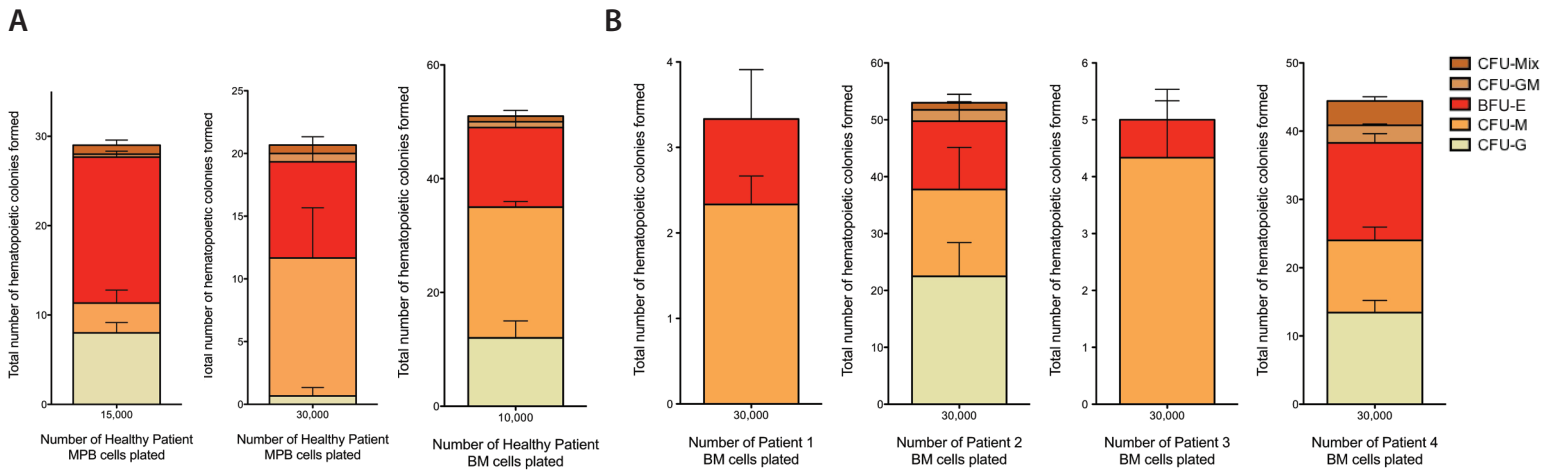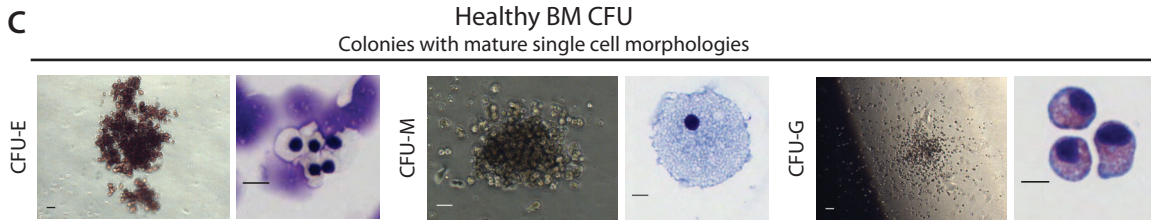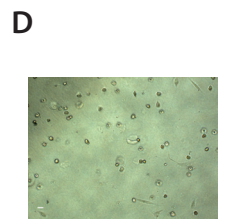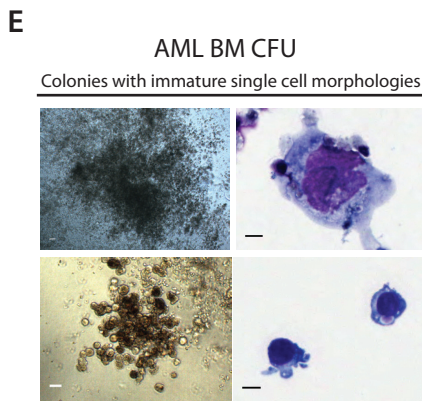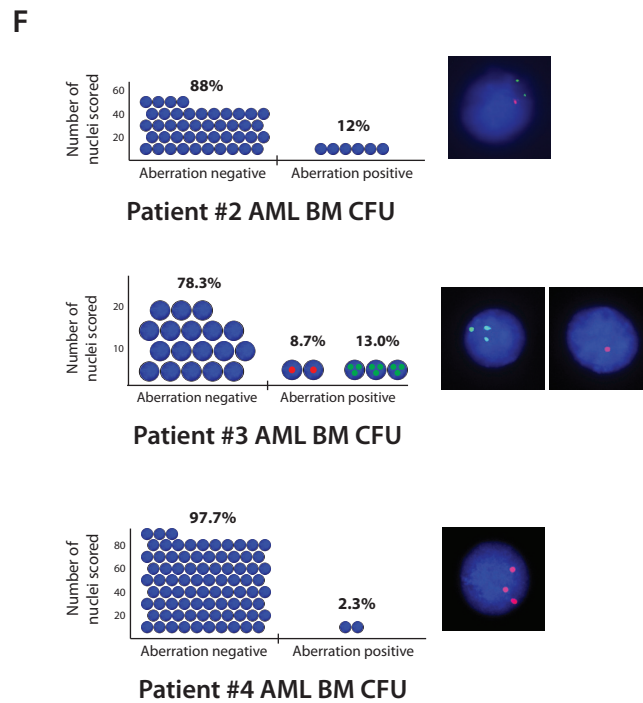

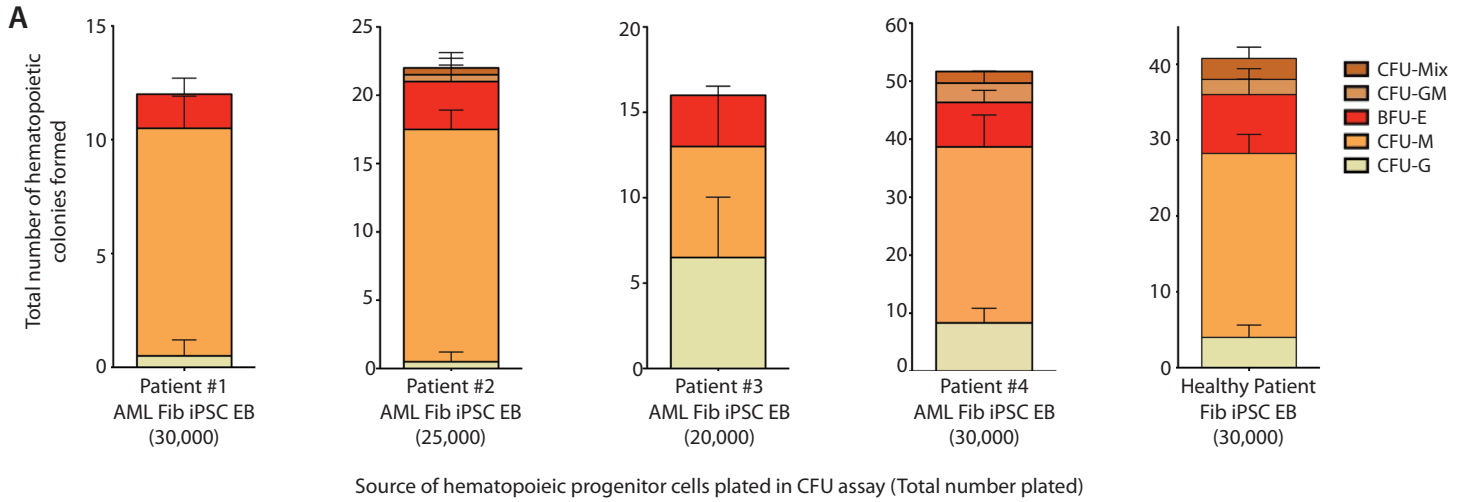

Patient #4 AML Fib iPSC-derived hematopoietic progenitors evaluated by CFU Assay

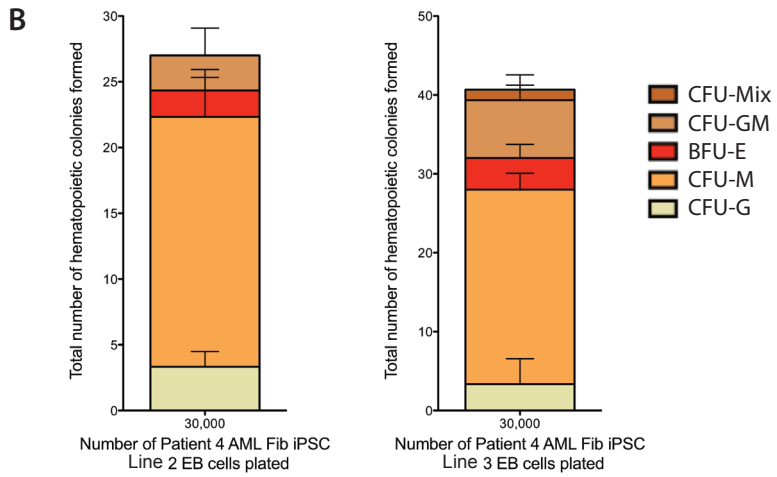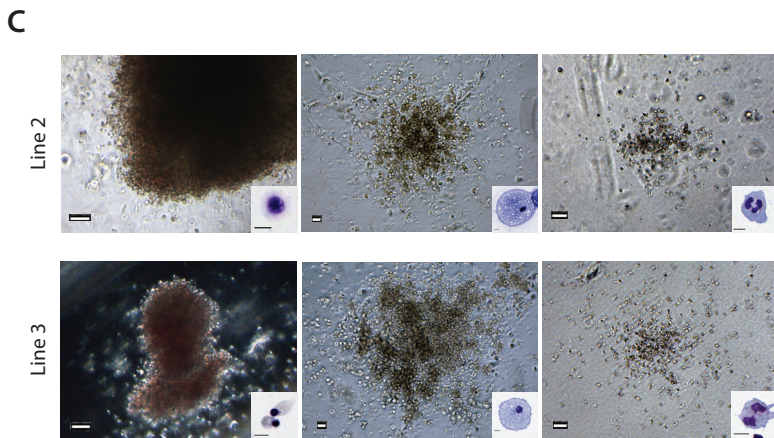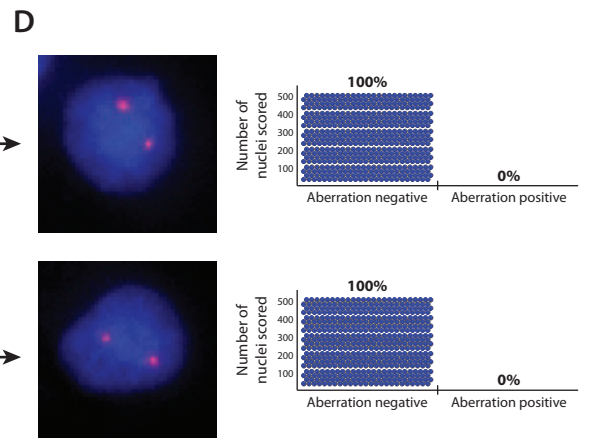

Supplement: stem0033-1839-sd1.pdf [file stem0033-1839-sd1.pdf]
